# Supplementary material for: Engineered EGCG‐Containing Biomimetic Nanoassemblies as Effective Delivery Platform for Enhanced Cancer Therapy
Source: PubMed Central journal article supplement (PMC9131592; doi:10.1002/advs.202105894), 2022-03-25
Supplement: ADVS-9-2105894-s001.pdf [file ADVS-9-2105894-s001.pdf]

## Supplementary Information

### Engineered EGCG-Containing Biomimetic Nanoassemblies as Effective Delivery Platform for Enhanced Cancer Therapy

Pengkai Wu<sup>1,3#</sup>, Haitian Zhang<sup>1#</sup>, Yin Yin<sup>1,3#</sup>, Meiling Sun<sup>3</sup>, Shuai Mao<sup>3</sup>, Huihui Chen<sup>1</sup>,  
Yexuan Deng<sup>3</sup>, Shuai Chen<sup>4</sup>, Shuo Li<sup>2\*</sup>, Beicheng Sun<sup>1,3\*</sup>

<sup>1</sup>Department of Hepatobiliary Surgery, Nanjing Drum Tower Hospital, Clinical College of Nanjing Medical University, Nanjing 210008, Jiangsu Province, P.R. China

<sup>2</sup>Department of Gastroenterology, The First Affiliated Hospital of Nanjing Medical University, Nanjing 210029, Jiangsu Province, P.R. China

<sup>3</sup>Department of Hepatobiliary Surgery, Nanjing Drum Tower Hospital, The Affiliated Hospital of Nanjing University Medical School, Nanjing 210008, Jiangsu Province, P.R. China

<sup>4</sup>MOE Key Laboratory of Model Animal for Disease Study, Department of Endocrinology, Nanjing Drum Tower Hospital, and Model Animal Research Center, School of Medicine, Nanjing University, Nanjing 210008

# These authors contributed equally to this work.

\*To whom correspondence should be addressed:

**Beicheng Sun**, M.D., Ph.D. Department of Hepatobiliary Surgery, Nanjing Drum Tower Hospital, Clinical College of Nanjing Medical University, Nanjing 210008, Jiangsu Province, P.R. China. Tel: 86-25-83105892; Email: [sunbc@nju.edu.cn](mailto:sunbc@nju.edu.cn).

**Shuo Li**, MD, PhD Department of Gastroenterology, The First Affiliated Hospital of Nanjing Medical University, Nanjing 210029, Jiangsu Province, P.R. China. [Tel:86-25-68306731](tel:86-25-68306731); Email: [shuoli@njmu.edu.cn](mailto:shuoli@njmu.edu.cn)

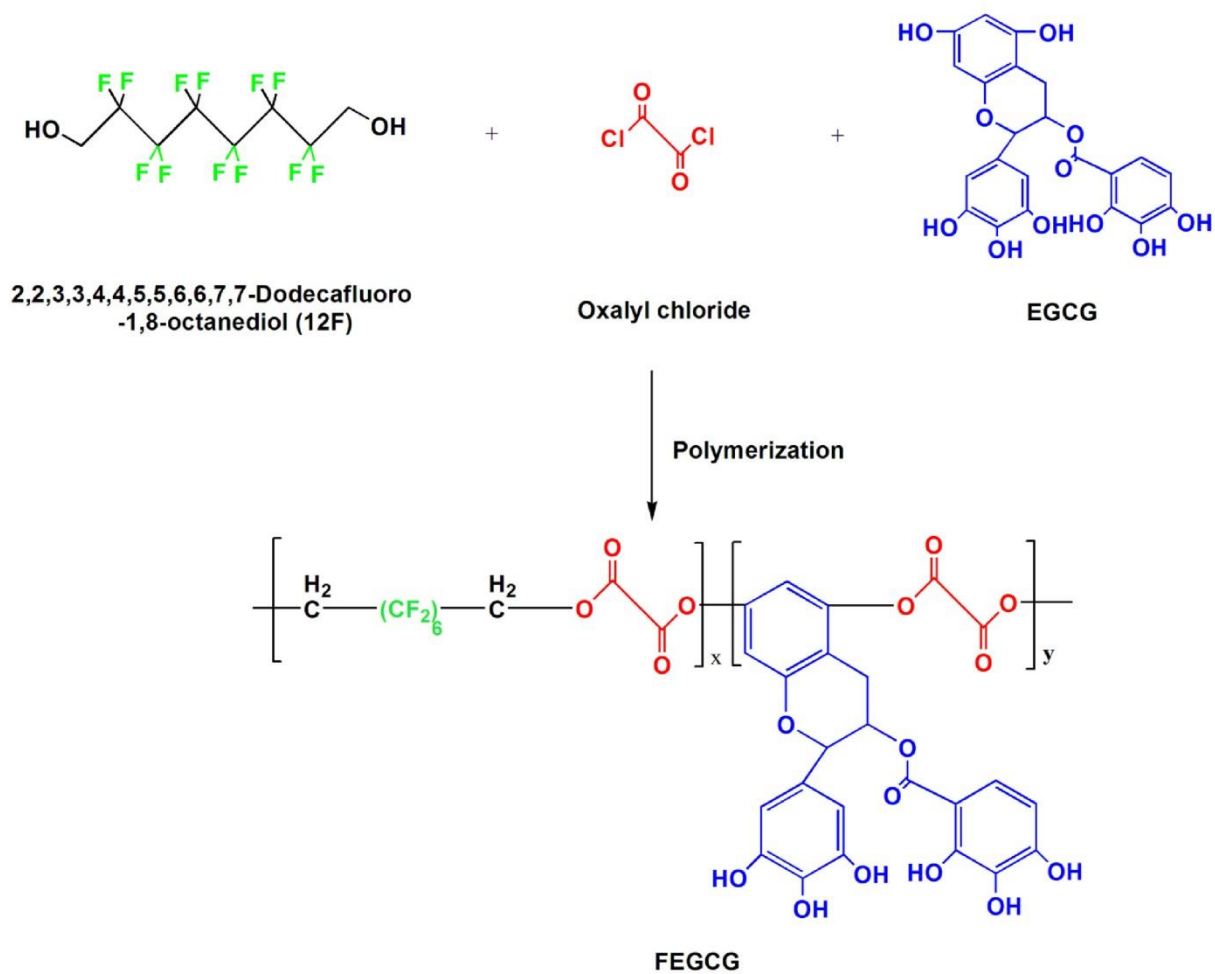

**Figure S1.** The synthesis route of FEGCG.

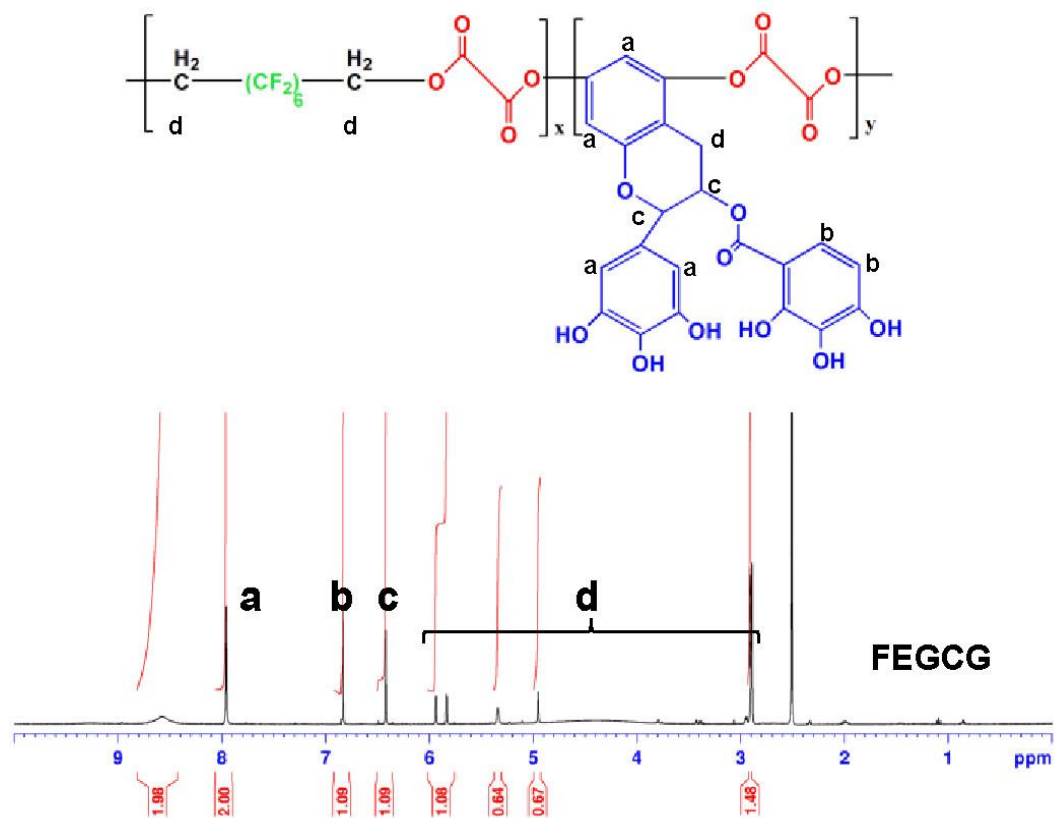

**Figure S2.**  $^1\text{H-NMR}$  and  $^{19}\text{F-NMR}$  spectrums of FEGCG in DMSO- $d_6$ .

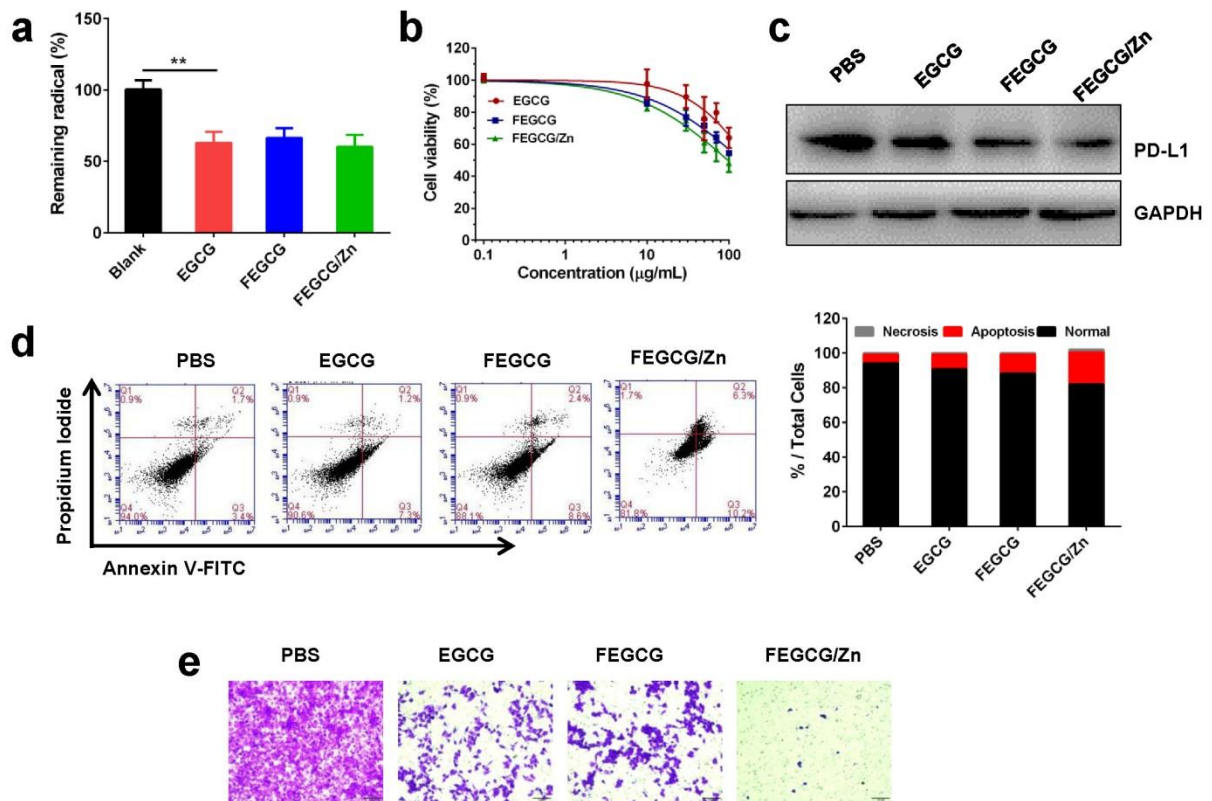

**Figure S3.** The free radical scavenging ability (n=3) (a), cytotoxicity (n=3) (b), PD-L1 expression (c), cell apoptosis (d) and cell migration ability (e) of EGCG, FEGCG and FEGCG/Zn in Hep1-6 cells. Data are presented as the means  $\pm$  SD. Error bars represent the standard deviations of three separate measurements.  $*P < 0.05$ ,  $**P < 0.01$  by one-way ANOVA analysis followed by Turkey's multiple comparisons.

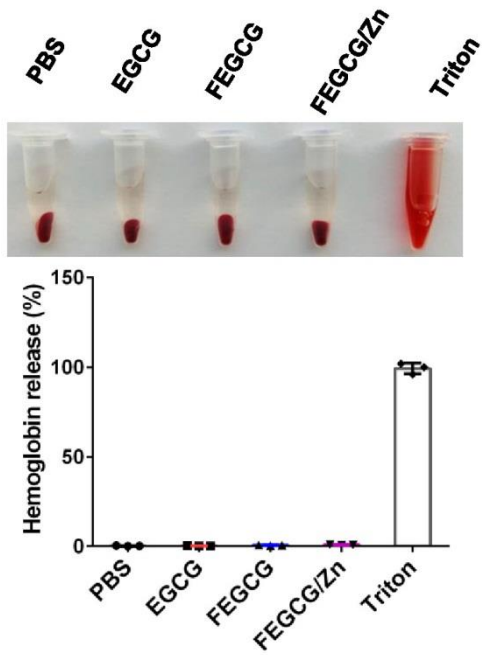

**Figure S4.** The hemolytic activity of EGCG, FEGCG and FEGCG/Zn on erythrocytes (n = 3). Data are presented as the means  $\pm$  SD. Error bars represent the standard deviations of three separate measurements.

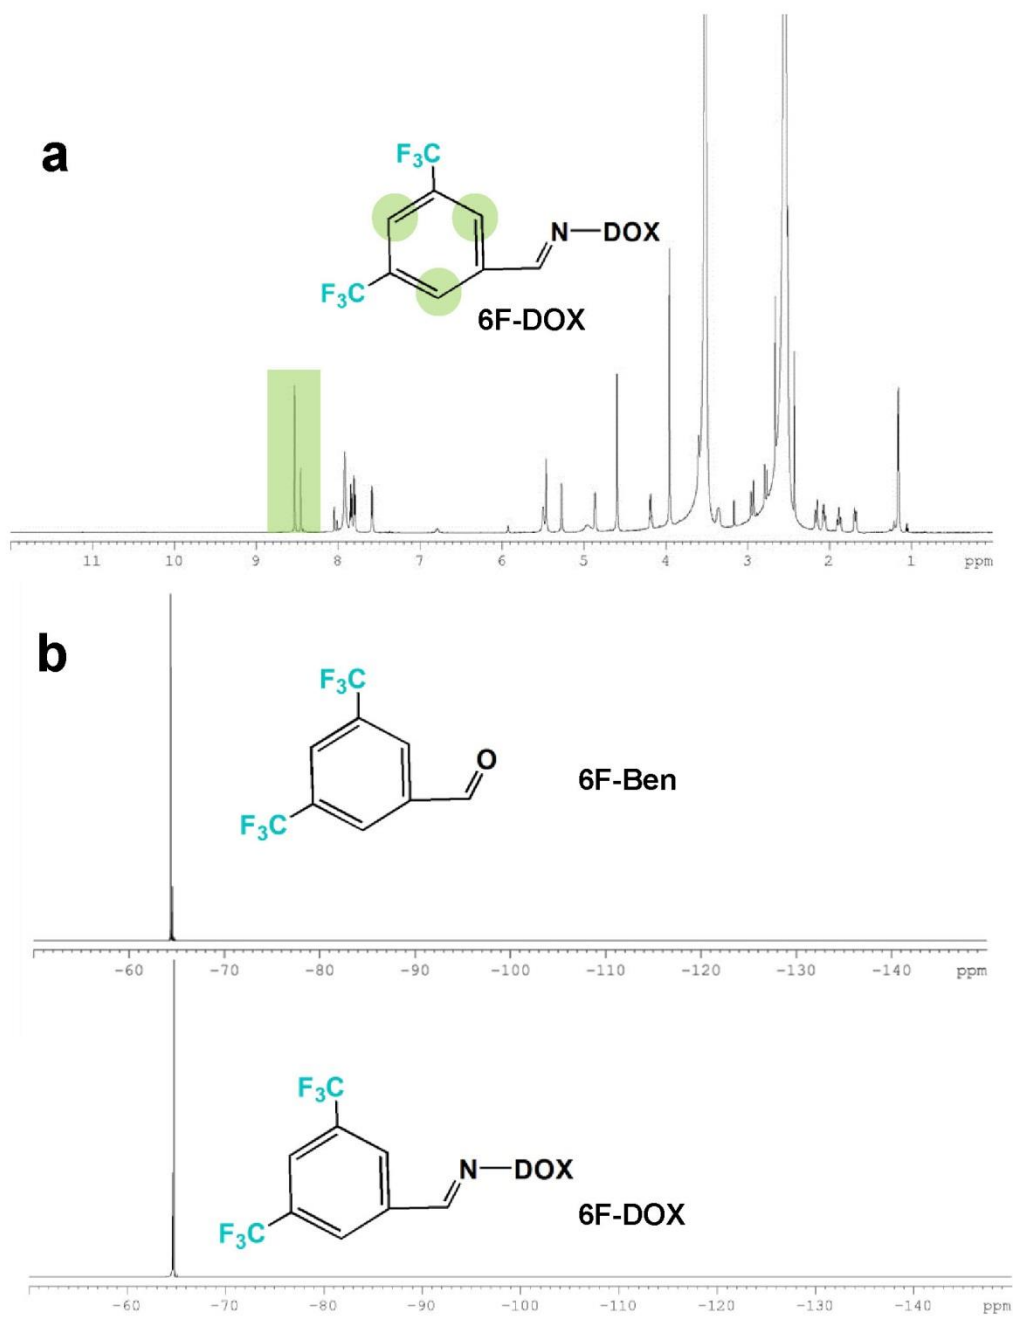

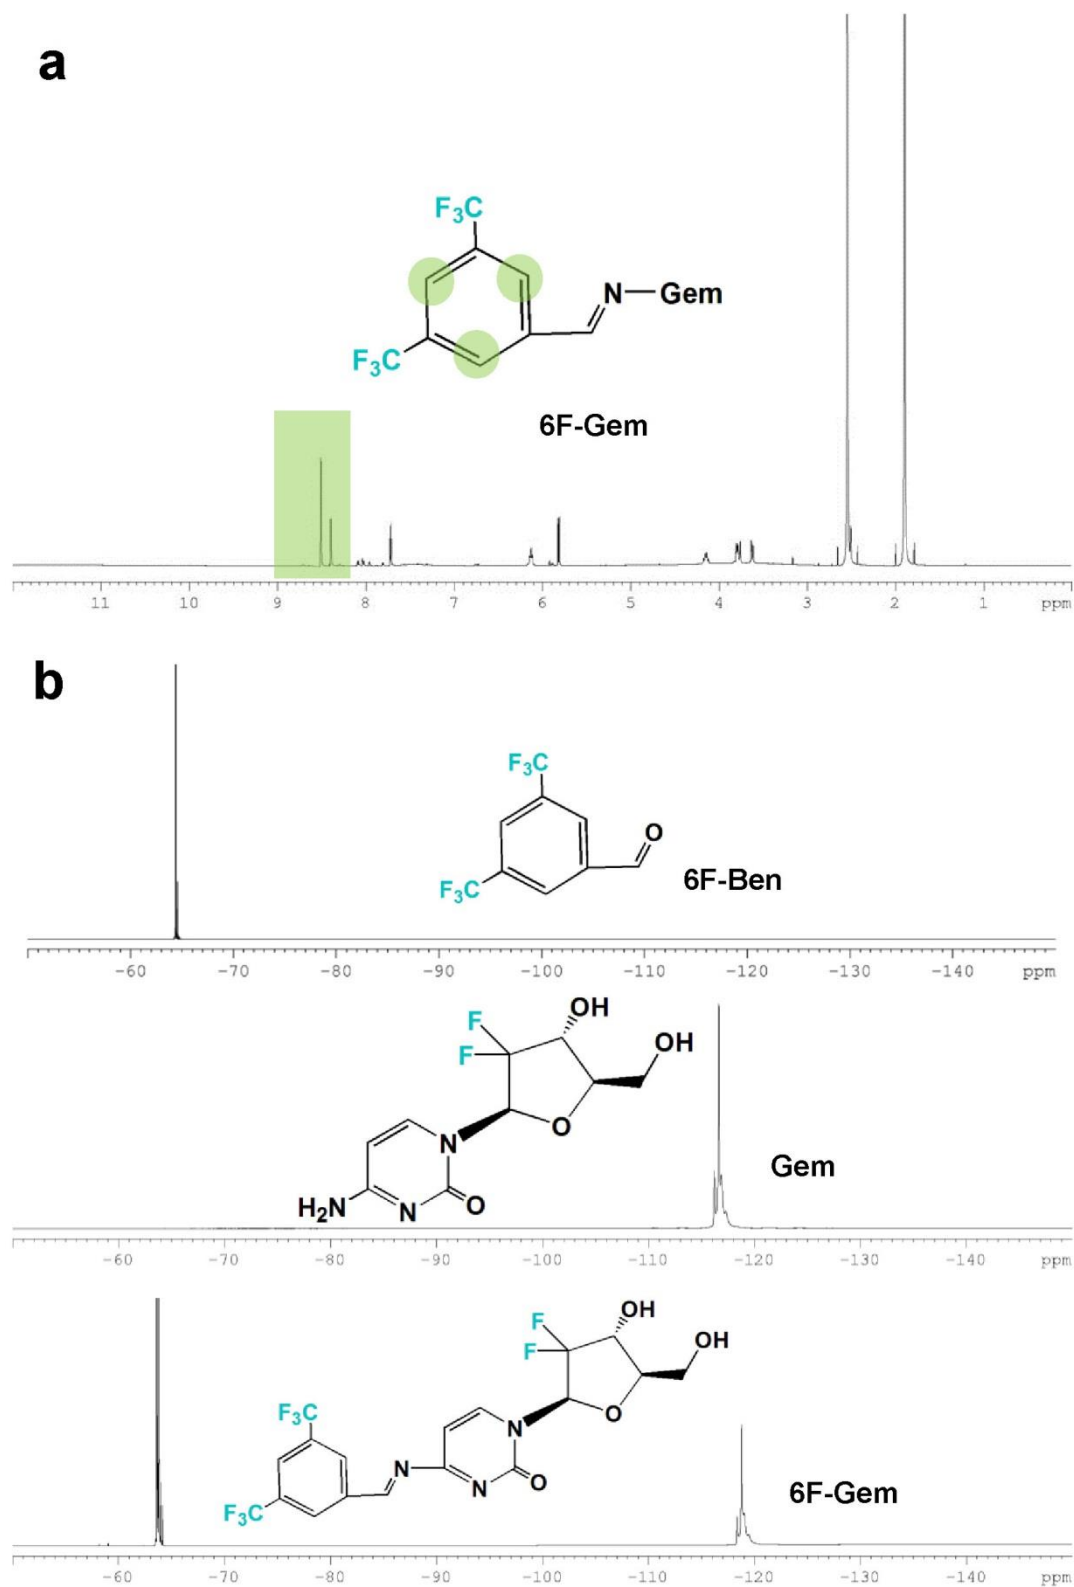

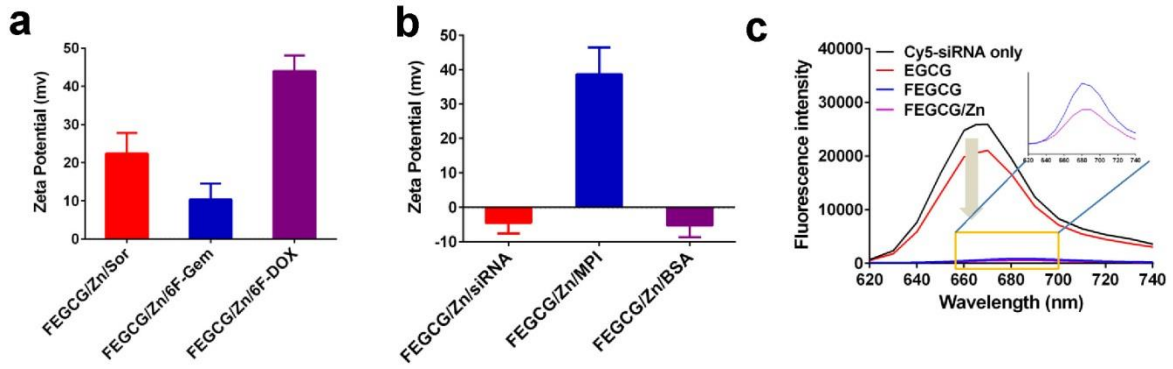

**Figure S7.** (a) The zeta potential of chemo-drugs loaded NPs (n = 3). (b) The zeta potential of siRNA polyplexes, MPI complexes and BSA complexes (n = 3). (c) siRNA loading efficiency determined by Cy5-siRNA fluorescence quenching assay. Data are presented as the means  $\pm$  SD. Error bars represent the standard deviations of three separate measurements.

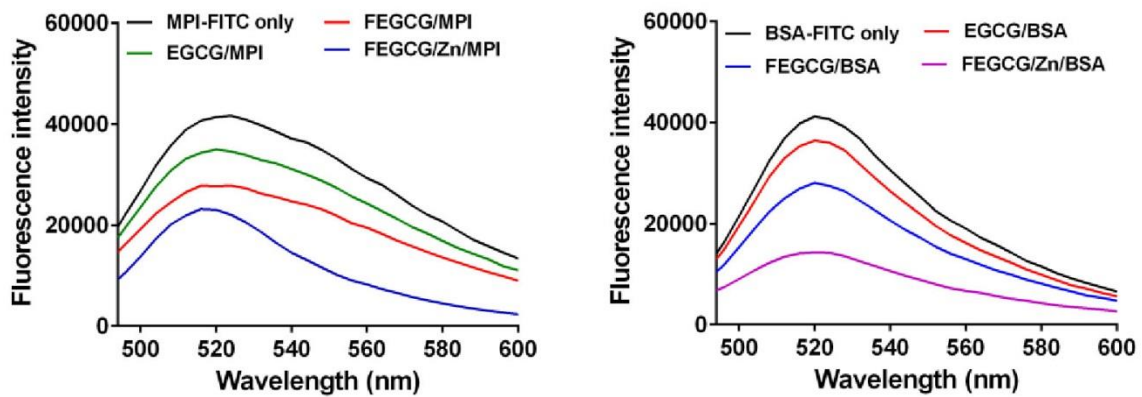

**Figure S8.** The related fluorescence spectrums of MPI only and different MPI complexes (a), and BSA only and different BSA complexes (b).



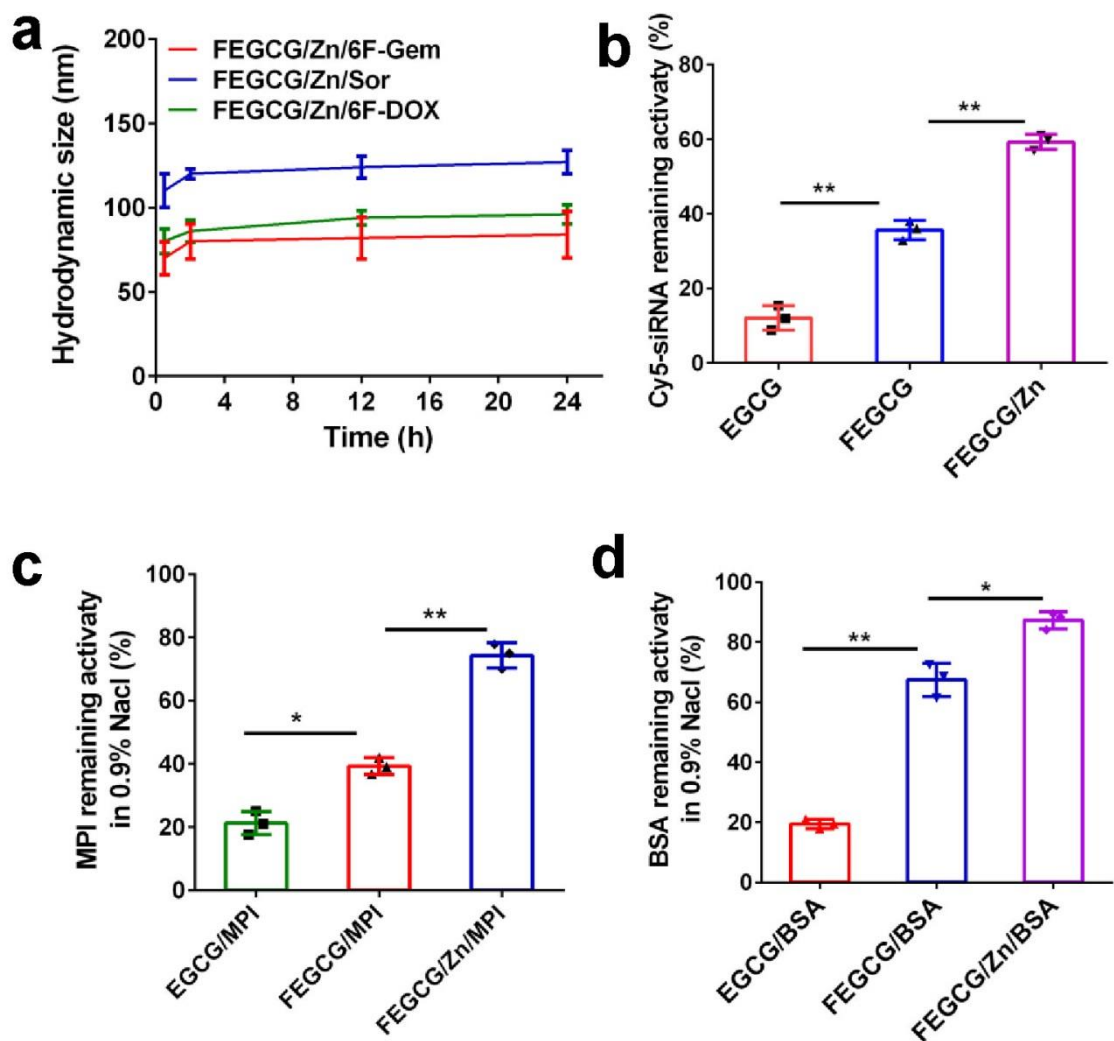

**Figure S9.** (a) The colloidal stability of chemo-drugs loaded NPs in PBS ( $n = 3$ ). (b) The RNase stability of siRNA loaded polyplexes ( $n = 3$ ). (c-d) The colloidal stability of MPI complexes and BSA complexes in 0.9% NaCl ( $n = 3$ ). Data are presented as the means  $\pm$  SD. Error bars represent the standard deviations of three separate measurements.  $*P < 0.05$ ,  $**P < 0.01$  by one-way ANOVA analysis followed by Turkey's multiple comparisons.

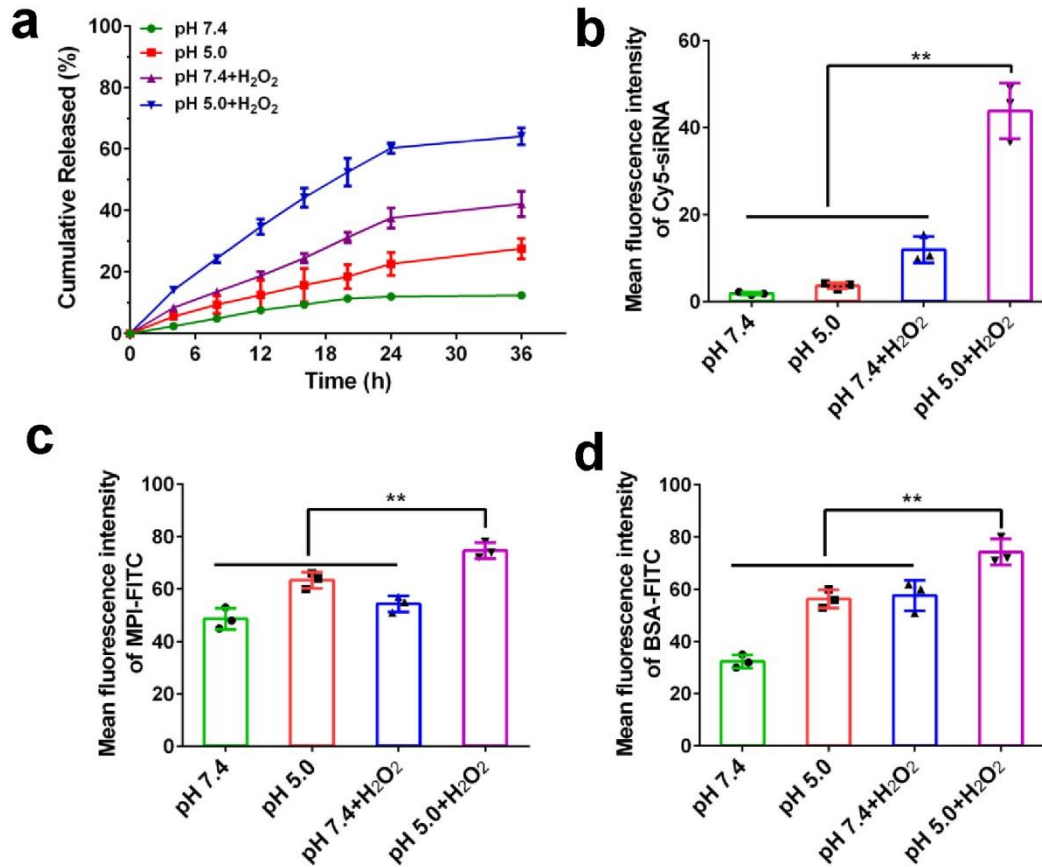

**Figure S10.** The *in vitro* sensitive release of FEGCG/Zn/6F-DOX NPs (a), FEGCG/Zn/siRNA polyplexes (b), FEGCG/Zn/MPI complexes (c) and FEGCG/Zn/BSA complexes (d) treated with H<sub>2</sub>O<sub>2</sub> and different pH values (n = 3). Data are presented as the means ± SD. Error bars represent the standard deviations of three separate measurements. \**P* < 0.05, \*\**P* < 0.01 by one-way ANOVA analysis followed by Turkey's multiple comparisons.

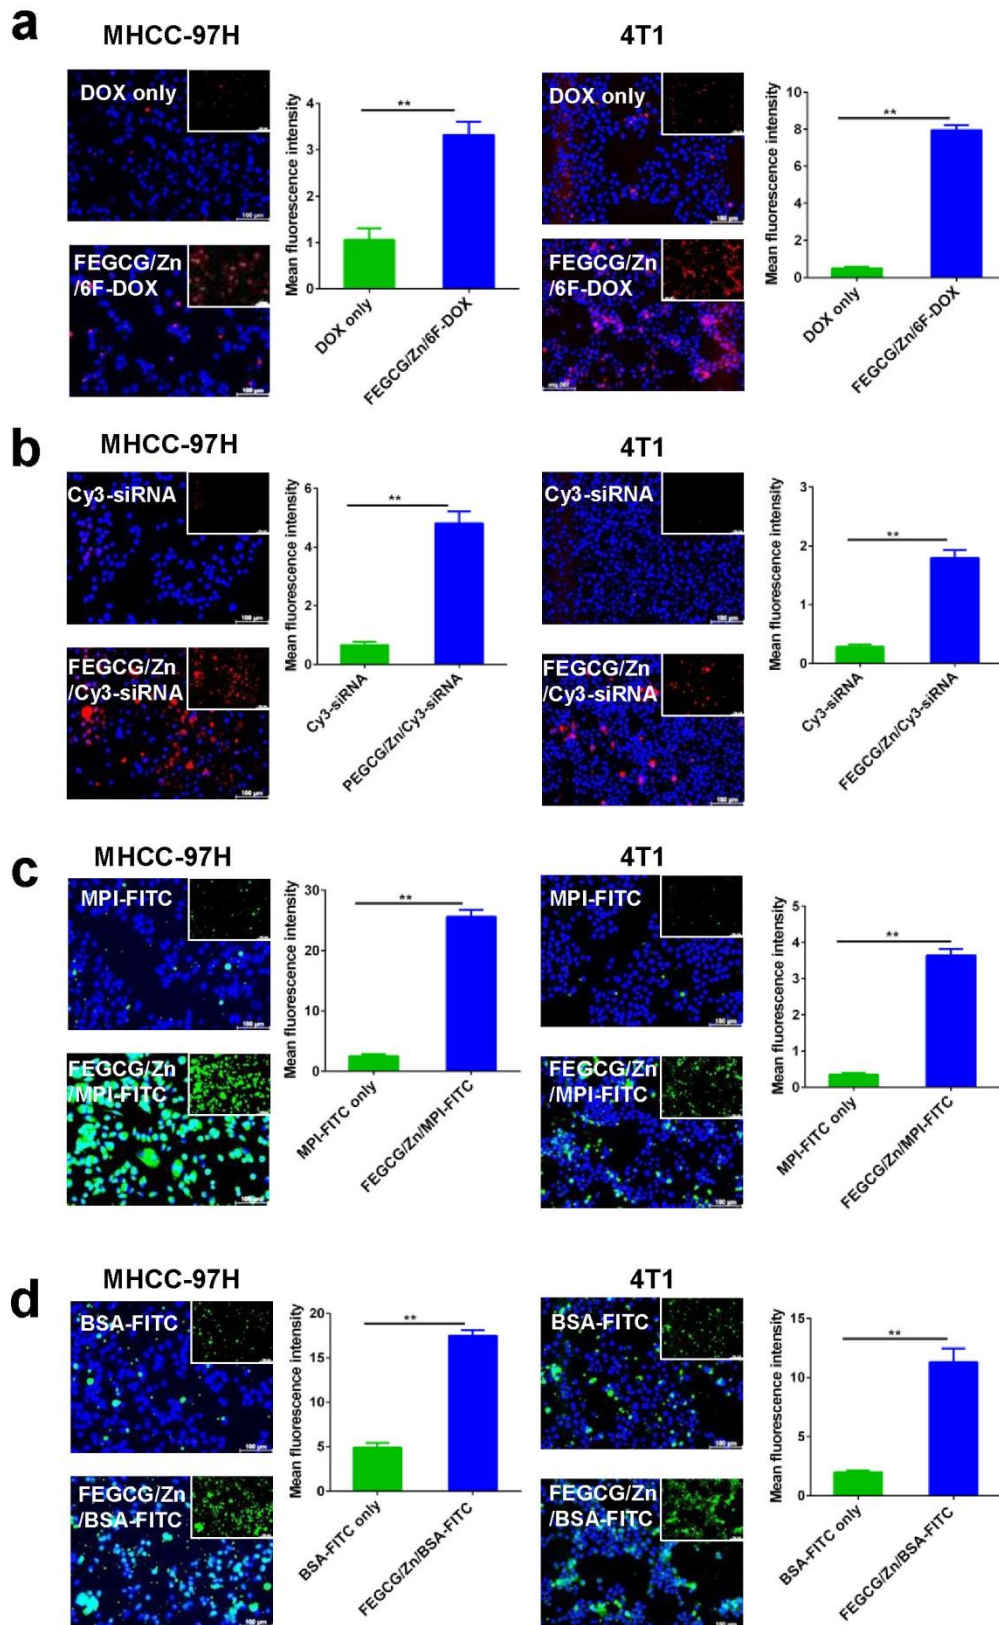

**Figure S11.** Confocal images and quantitative analysis of MHCC-97H and 4T1 cells treated with free DOX and FEGCG/Zn/6F-DOX NPs (a), free siRNA and FEGCG/Zn/siRNA

polyplexes (b), free MPI and FEGCG/Zn/MPI complexes (c), free BSA and FEGCG/Zn/BSA complexes (d) (n = 3). Data are presented as the means  $\pm$  SD. Error bars represent the standard deviations of three separate measurements. \* $P < 0.05$ , \*\* $P < 0.01$  by an unpaired two-tailed Student's t-test.

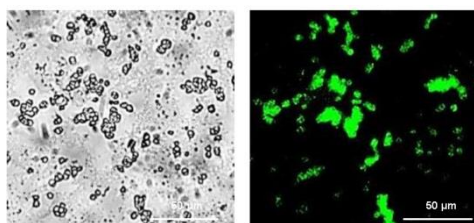

**Figure S12.** Confocal images of erythrocytes and FEGCG/Zn/FAM-siRNA/Erythrocyte system. Scale bar=50  $\mu$ m.

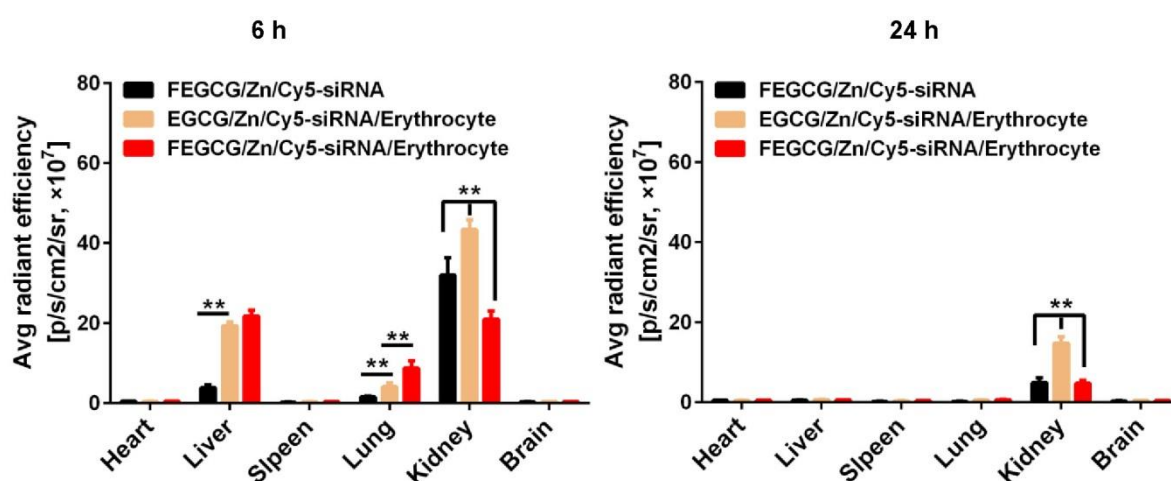

**Figure S13.** The biodistribution and quantitative analysis of FEGCG/Zn/Cy5-siRNA, EGCG/Zn/Cy5-siRNA/ Erythrocyte and FEGCG/Zn/Cy5-siRNA/Erythrocyte 6 h and 24 h after i.v. administration in healthy mice (n = 3). Data are presented as the means  $\pm$  SD. Error bars represent the standard deviations of three separate measurements. \* $P < 0.05$ , \*\* $P < 0.01$  by one-way ANOVA analysis followed by Turkey's multiple comparisons.

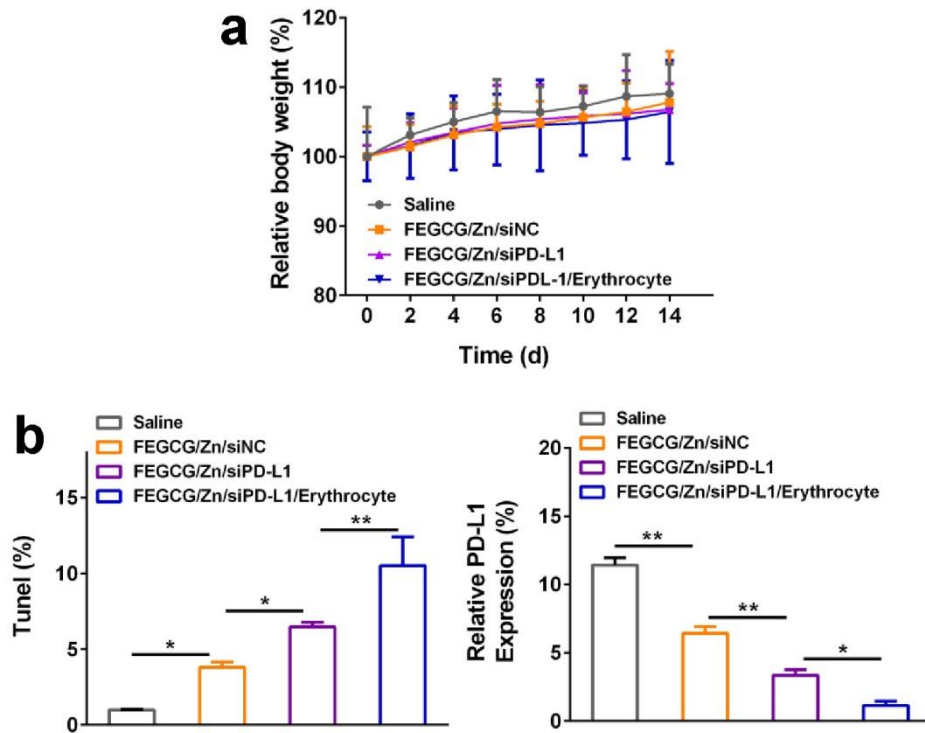

**Figure S14.** The body weights of each group during treatment period (n = 6) (a). (b) Quantitative analysis of TUNEL staining and PD-L1 immunofluorescence staining in tumor tissues (n = 3). Data are presented as the means  $\pm$  SD. Error bars represent the standard deviations of at least three separate measurements. \* $P < 0.05$ , \*\* $P < 0.01$  by one-way ANOVA analysis followed by Turkey's multiple comparisons.

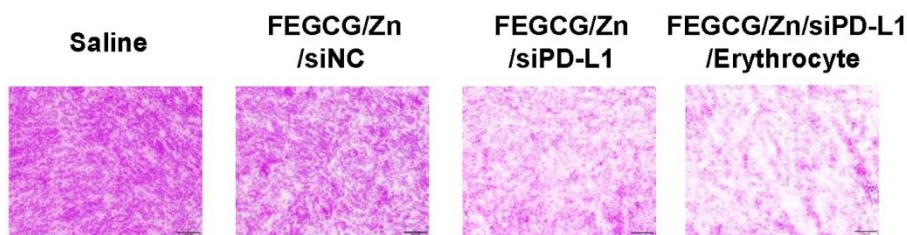

**Figure S15.** Representative images of H&E staining in tumor tissues after different treatments. Scale bar=100  $\mu$ m.

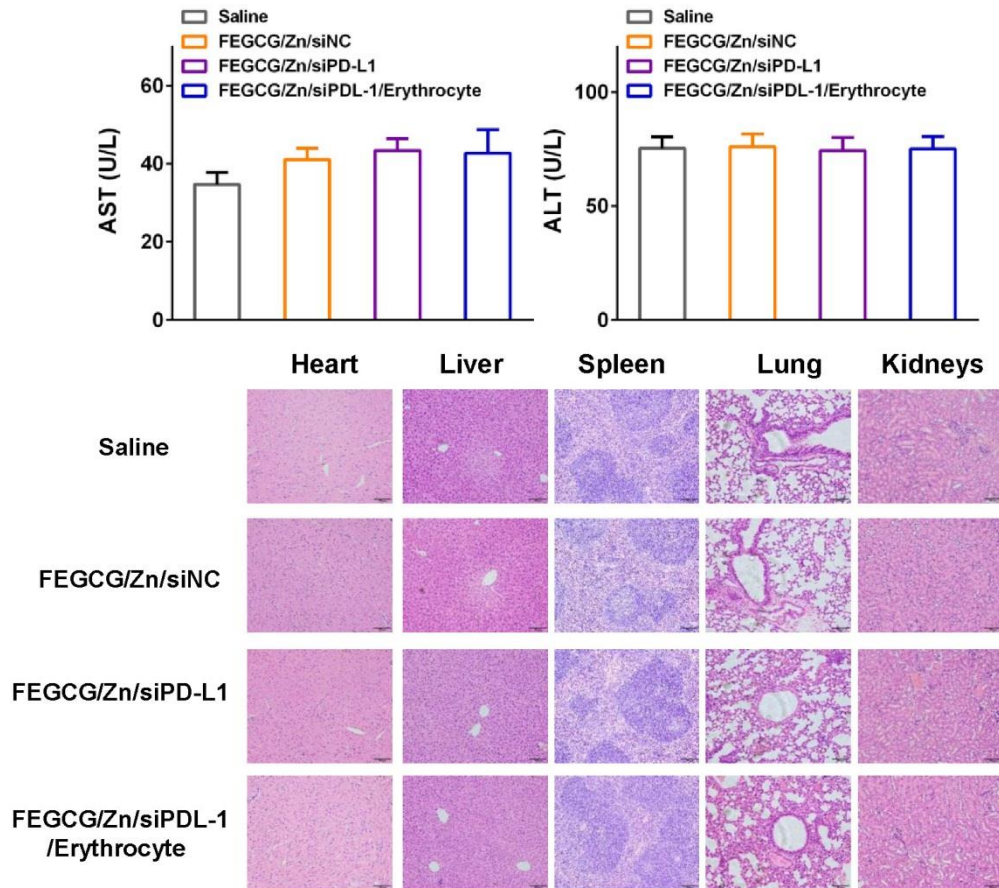

**Figure S16.** The serum biomarkers levels of AST and ALT (n = 3) (a-b), and the H&E staining of major organs (c) in healthy mice. Scale bar=200 μm. Data are presented as the means ± SD. Error bars represent the standard deviations of three separate measurements. \* $P < 0.05$ , \*\* $P < 0.01$  by one-way ANOVA analysis followed by Turkey's multiple comparisons.

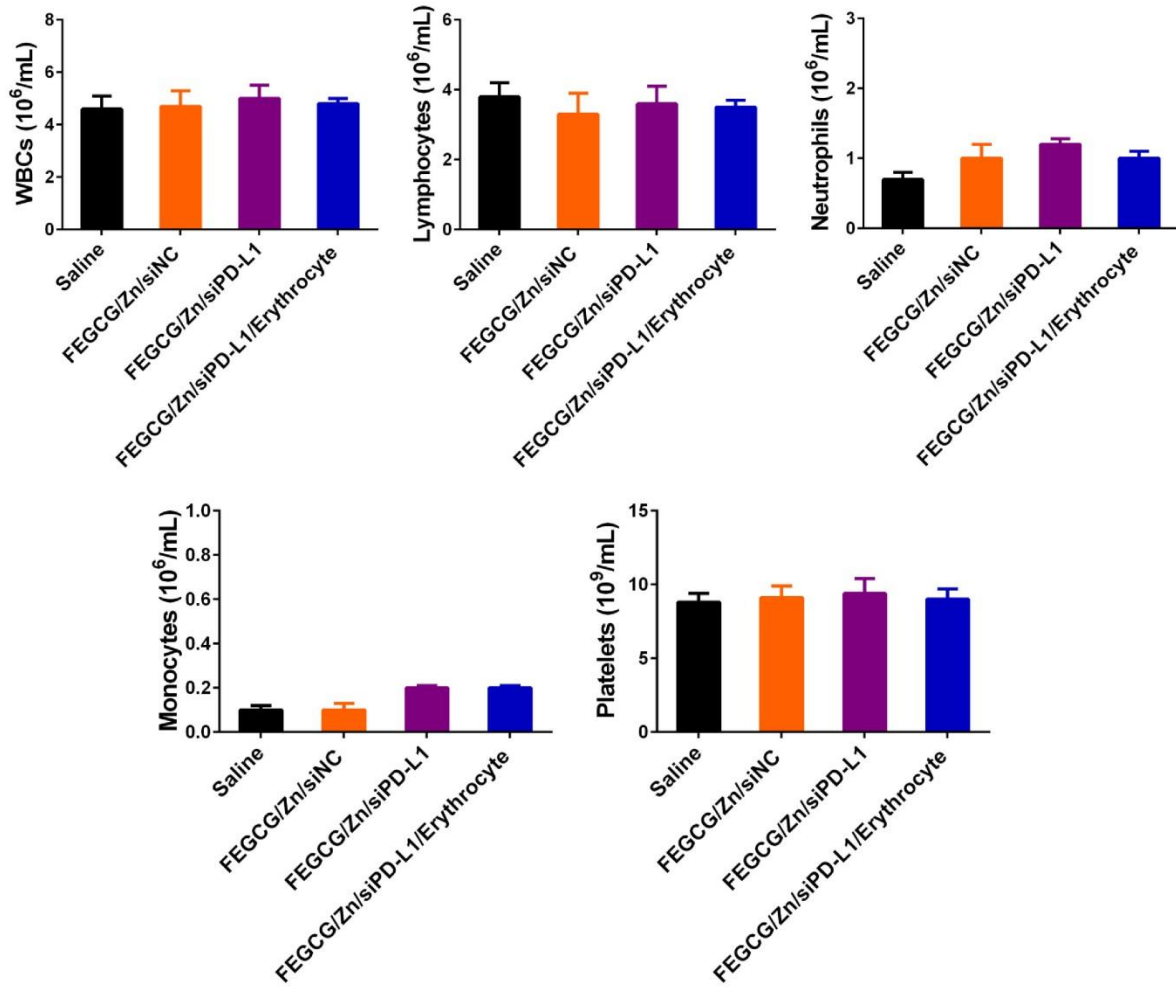

Figure S17. The blood analysis of WBCs, lymphocytes, neutrophils, monocytes and platelets after different treatments in healthy mice ( $n = 3$ ). Data are presented as the means  $\pm$  SD. Error bars represent the standard deviations of three separate measurements.  $*P < 0.05$ ,  $**P < 0.01$  by one-way ANOVA analysis followed by Turkey's multiple comparisons.
